# Supplementary material for: Role of ammonia in European air quality with changing landand ship emissions between 1990 and 2030
Source: Copernicus journal article supplement (doi:10.5194/acp-2020-872), 2020-08-31
Supplement: Supplementary file 1 [file acp-2020-872-supplement.pdf]

## Supplementary

**Table S1:** Model performance for annual mean concentrations of ammonia ( $\text{NH}_3$ ), total ammonia ( $\text{TNH}_x$ ), total nitrate ( $\text{TNO}_3$ ), ammonium ( $\text{PNH}_4$ ), nitrate ( $\text{PNO}_3$ ), sulfate ( $\text{PSO}_4$ ) and accumulated annual wet deposition of  $\text{WNH}_x$ ,  $\text{WNO}_x$  and  $\text{WSO}_x$  in 2010. MB: mean bias; ME: mean error; RMSE: root-mean-square error; MFB: mean fractional bias; MFE: mean fractional error;  $r$ : Pearson correlation coefficient.

|                | number of stations | MB*  | ME* | RMSE* | MFB (%) | MFE (%) | $r$   |
|----------------|--------------------|------|-----|-------|---------|---------|-------|
| $\text{NH}_3$  | 29                 | 0.5  | 2.7 | 4.3   | 19.3    | 92.1    | 0.47  |
| $\text{TNH}_x$ | 51                 | 1.1  | 1.6 | 2.3   | 35.5    | 65.7    | 0.34  |
| $\text{TNO}_3$ | 52                 | 0.0  | 0.6 | 1.5   | 26.0    | 51.6    | -0.04 |
| $\text{PNH}_4$ | 32                 | 0.5  | 0.5 | 0.7   | 45.7    | 47.5    | 0.80  |
| $\text{PNO}_3$ | 25                 | 1.5  | 2.7 | 3.2   | 54.6    | 104.1   | -0.20 |
| $\text{PSO}_4$ | 43                 | 0.1  | 0.6 | 0.8   | 4.7     | 30.6    | 0.60  |
| $\text{WNH}_x$ | 32                 | -120 | 133 | 178   | -40.1   | 45.5    | 0.81  |
| $\text{WNO}_x$ | 36                 | -142 | 143 | 206   | -58.2   | 62.0    | 0.75  |
| $\text{WSO}_x$ | 33                 | -115 | 117 | 227   | -50.1   | 51.2    | 0.62  |

\* Units:  $\text{NH}_3$ : ppb,  $\text{TNH}_x$  and  $\text{TNO}_3$ :  $\mu\text{g N m}^{-3}$ ,  $\text{PNH}_4$ ,  $\text{PNO}_3$  and  $\text{PSO}_4$ :  $\mu\text{g m}^{-3}$ ,  $\text{WNH}_x$  and  $\text{WNO}_x$ :  $\text{mg N m}^{-2}$ ,  $\text{WSO}_x$ :  $\text{mg S m}^{-2}$

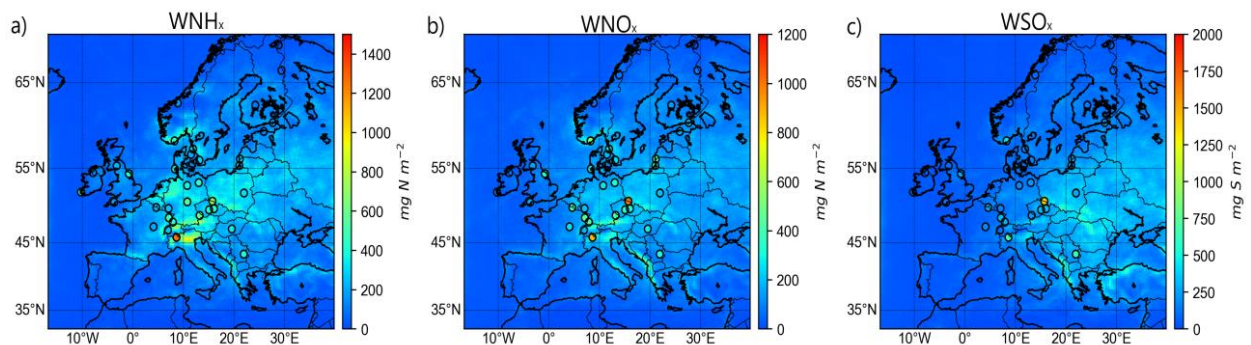

**Figure S1:** Accumulated annual wet deposition estimated for a)  $\text{WNH}_x$  ( $\text{mg N m}^{-2}$ ), b)  $\text{WNO}_x$  ( $\text{mg N m}^{-2}$ ), c)  $\text{WSO}_x$  ( $\text{mg S m}^{-2}$ ) in 2010. The colored circles show the measurements.

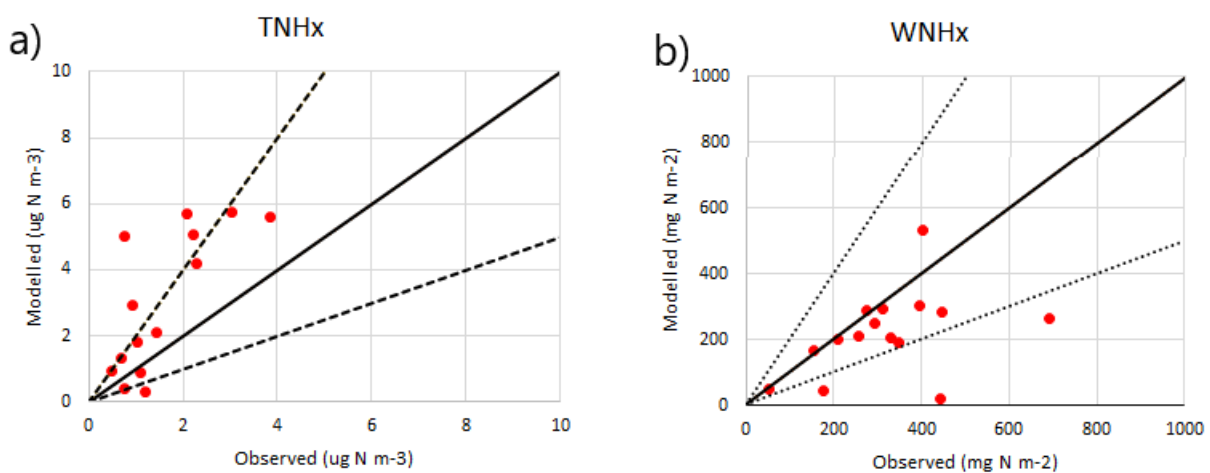

**Figure S2:** Modelled versus measured a) annual concentrations of  $\text{TNH}_x$  ( $\text{mg N m}^{-2}$ ), b) accumulated annual wet deposition of  $\text{WNH}_x$  ( $\text{mg N m}^{-2}$ ) at common sites in 2010.

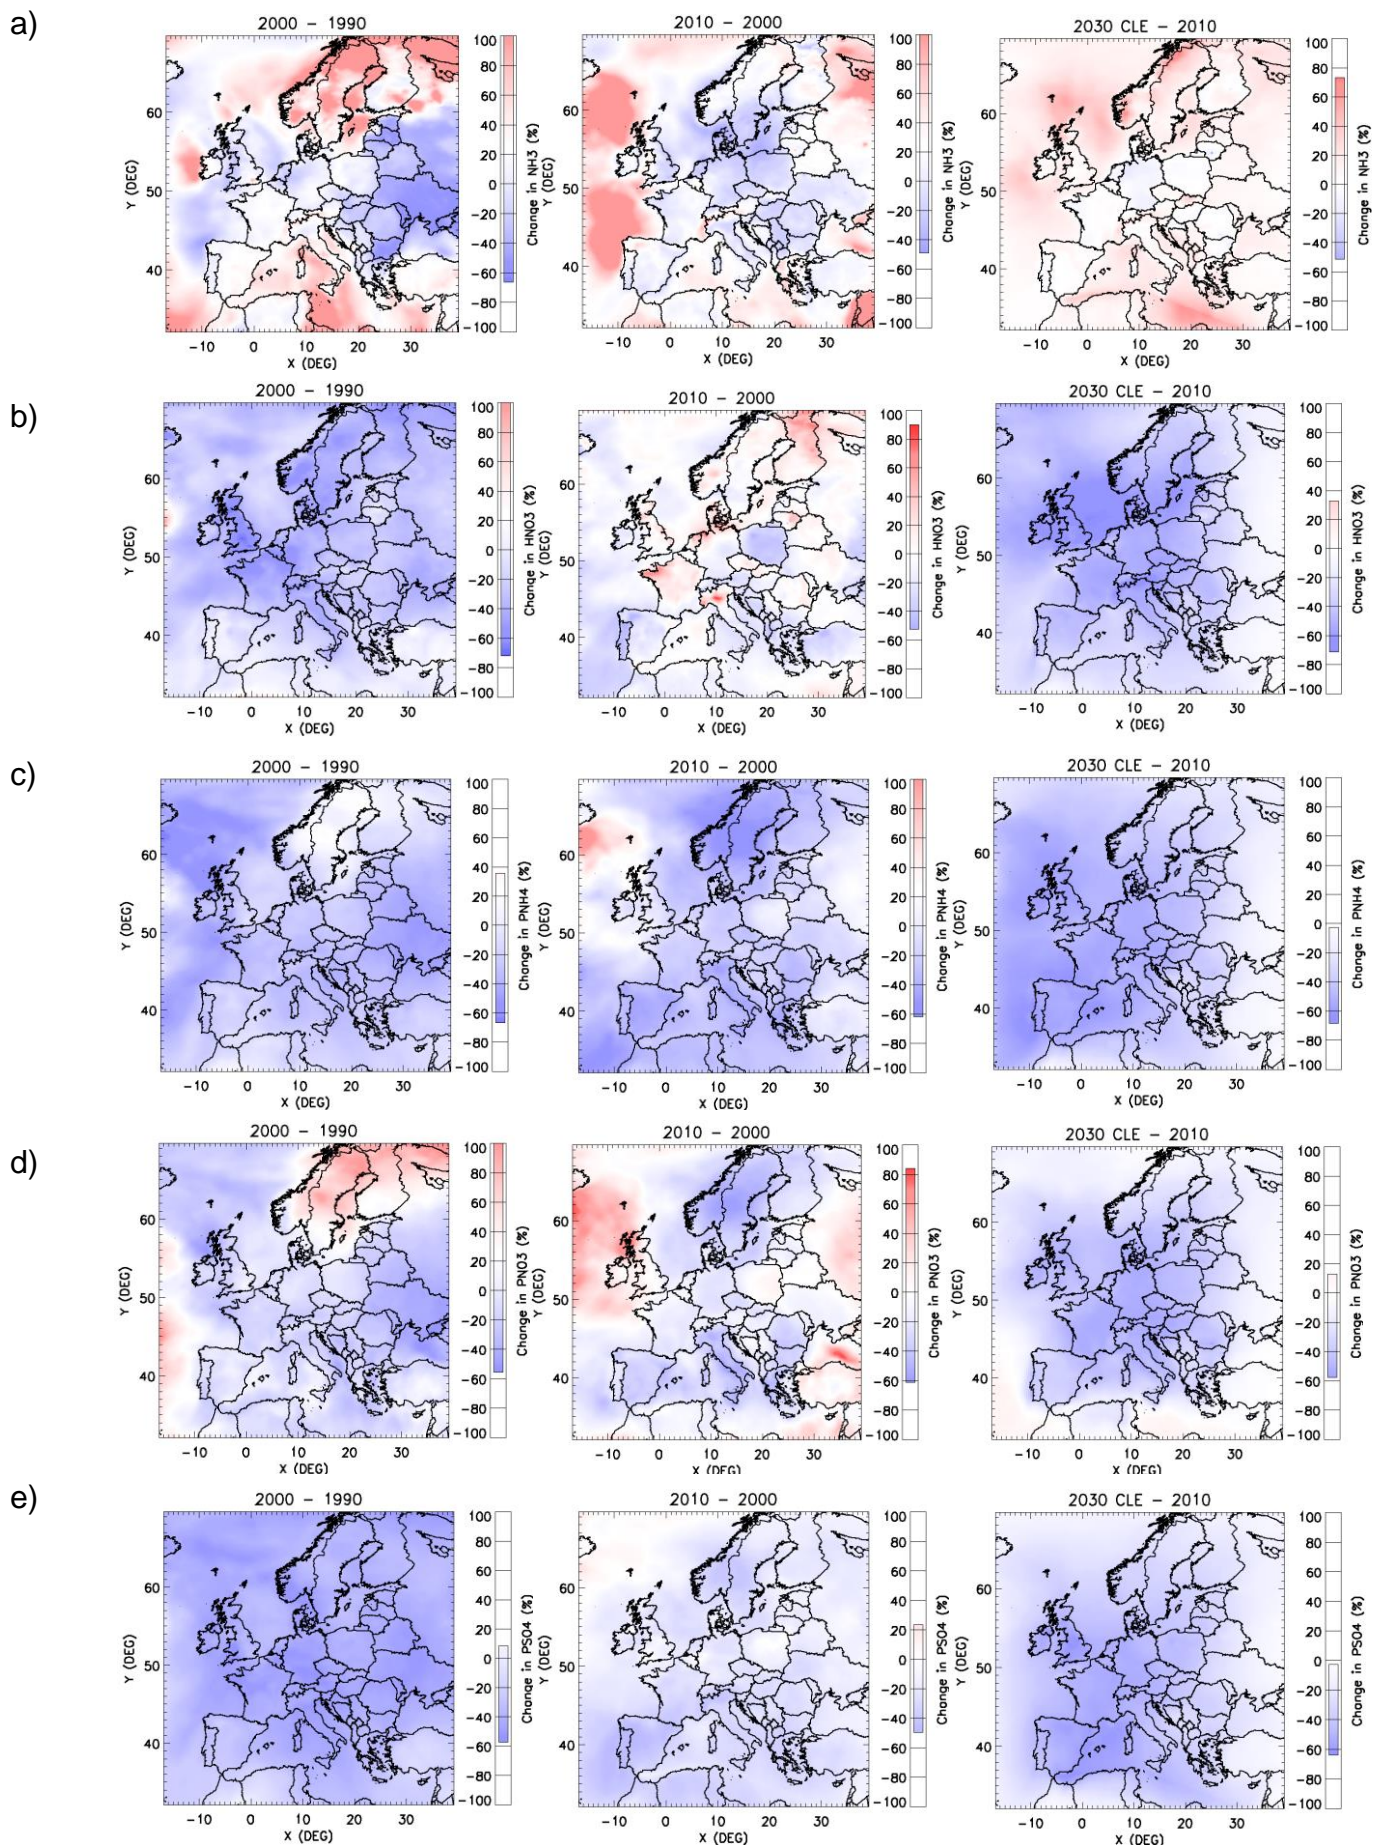

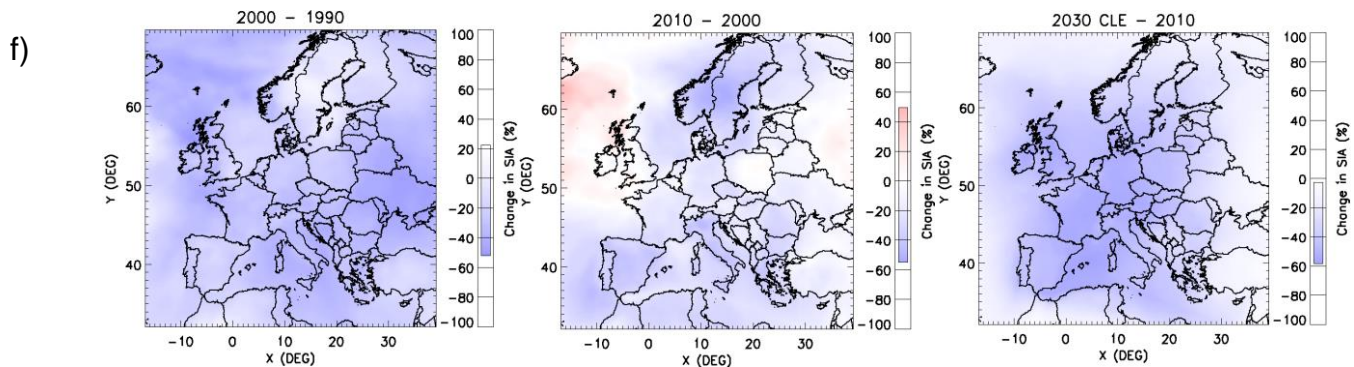

**Figure S3:** Relative changes (%) in annual average concentrations of a)  $\text{NH}_3$ , b)  $\text{HNO}_3$ , c)  $\text{PNH}_4$ , d)  $\text{PNO}_3$ , e)  $\text{PSO}_4$  and f) SIA between 1990 and 2000 (left), 2000 and 2010 (middle) and 2010 and 2030\_CLE (right).

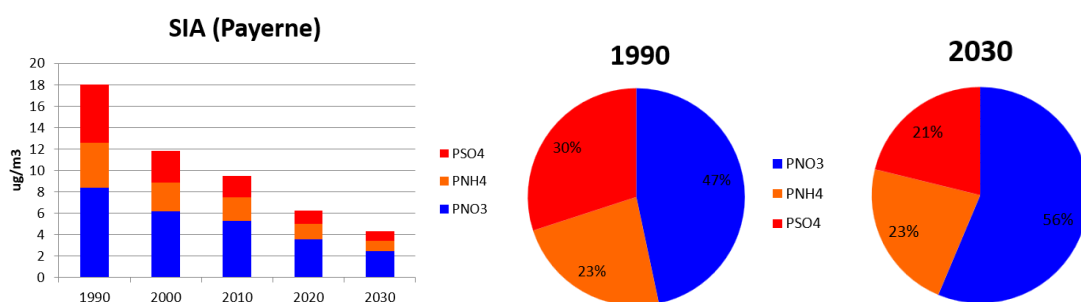

**Figure S4:** The modeled annual concentrations of SIA components between 1990 and 2030\_CLE (left) and relative composition of SIA in 1990 (middle) and 2030\_CLE (right) at Payerne (Switzerland).

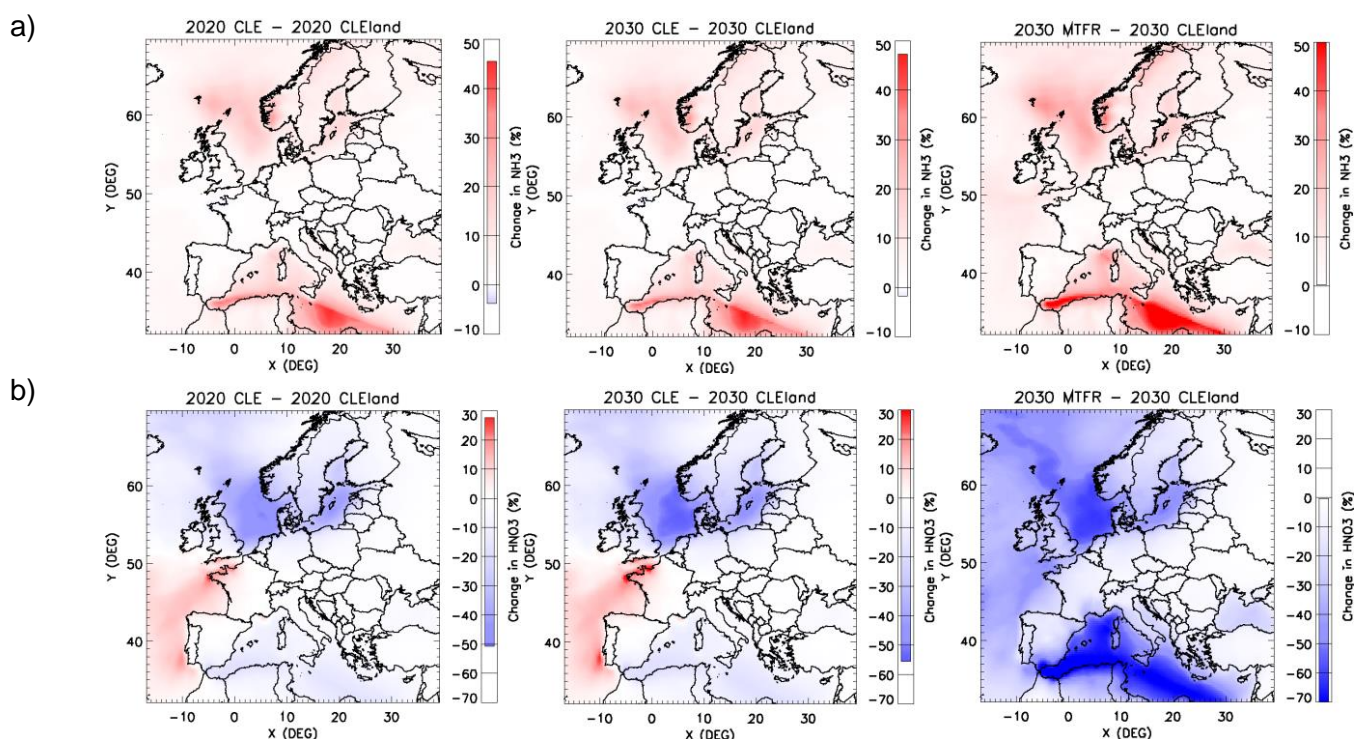

c)

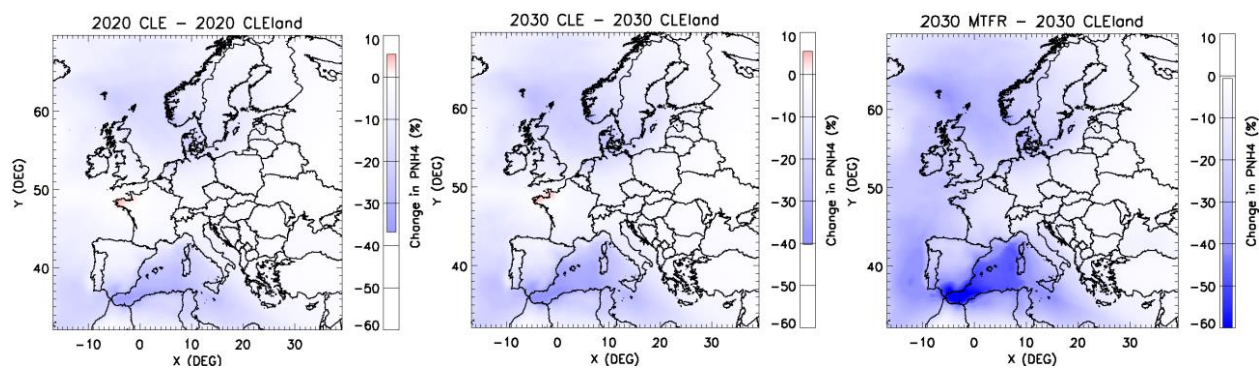

d)

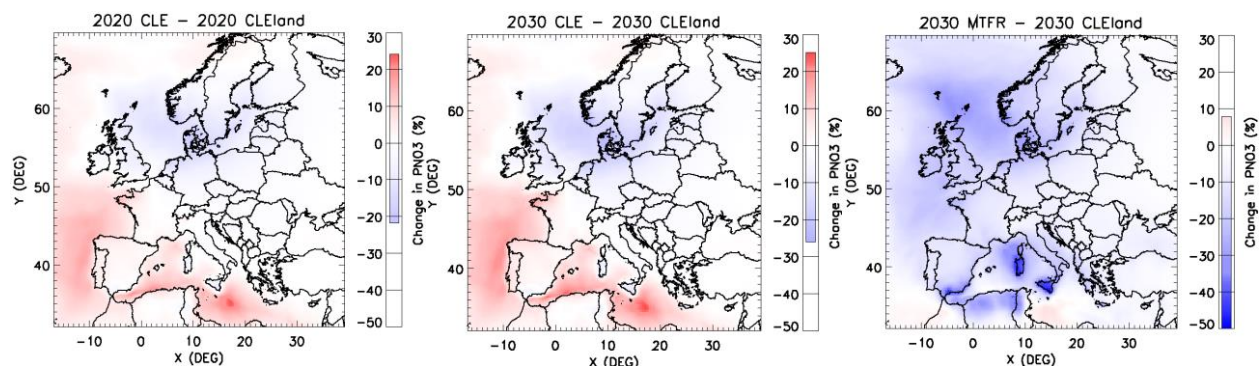

e)

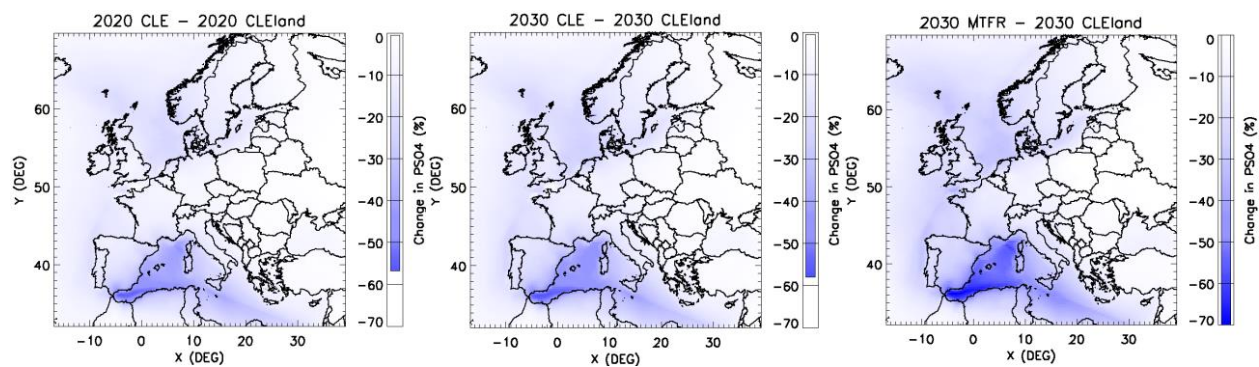

f)

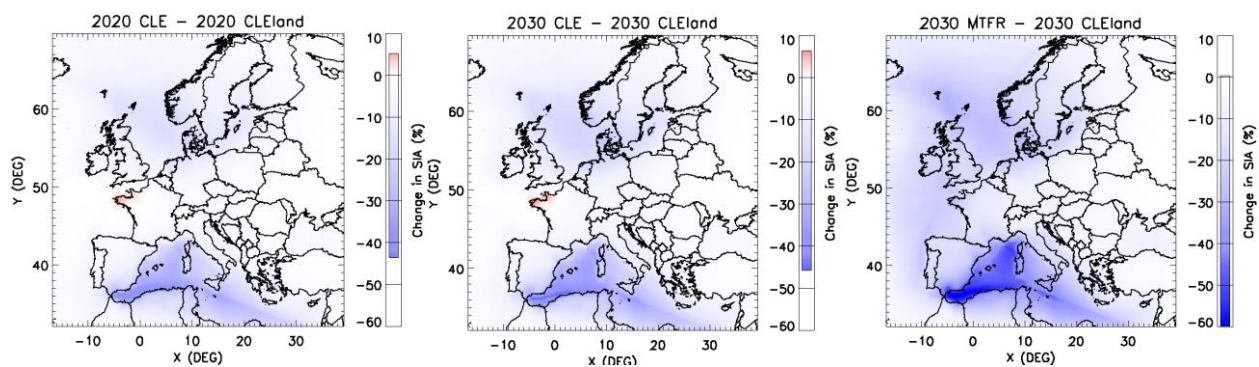

g)

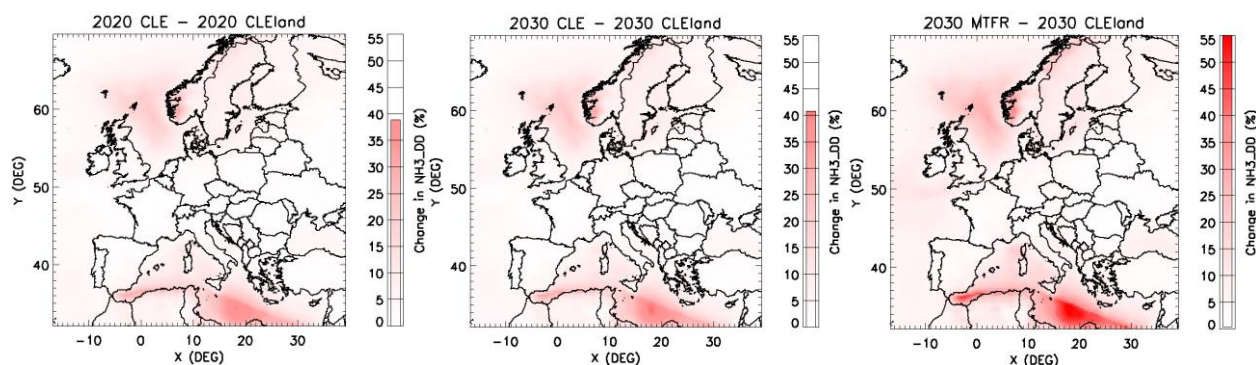

**Figure S5:** Effect of ship emissions (%) on annual average concentrations of a) ammonia ( $\text{NH}_3$ ), b) nitric acid ( $\text{HNO}_3$ ), c) ammonium ( $\text{PNH}_4$ ), d) particulate nitrate ( $\text{PNO}_3$ ), e) sulfate ( $\text{PSO}_4$ ), f) secondary inorganic aerosols (SIA) and g) on annual dry deposition of ammonia in scenarios 2020\_CLE (left), 2030\_CLE (middle) and 2030\_MTFR (right).

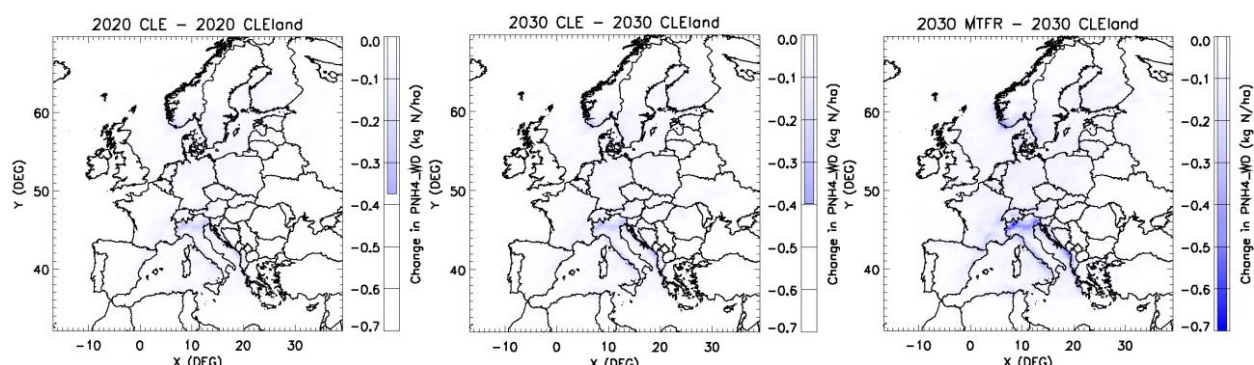

**Figure S6:** Effect of ship emissions on wet deposition of ammonium ( $\text{kg N ha}^{-1}$ ) in scenarios 2020\_CLE (left), 2030\_CLE (middle) and 2030\_MTFR (right).
